# Supplementary material for: Enhanced removal of emerging contaminants from tap water by developing graphene oxide and nanoplatelet hybrid aerogels
Source: Royal Society of Chemistry journal article supplement (doi:10.1039/d4ra05658b), 2024-01-01
Supplement: d4ra05658b1.pdf [file d4ra05658b1.pdf]

## Enhanced removal of emerging contaminants from tap water by developing graphene oxide and nanoplatelet hybrid aerogels

G. Gorgolis<sup>1,2,\*</sup>, F. Tunioli<sup>3</sup>, G. Paterakis<sup>1,2</sup>, M. Melucci<sup>3,\*</sup>, N. Koutroumanis<sup>2</sup>, L. Sygellou<sup>2</sup>, M. S. S. Bafqi<sup>4</sup>, B. Saner Okan<sup>4,5,\*</sup>, C. Galiotis<sup>1,2,\*</sup>

<sup>1</sup> Panepistimioupoli – 26504 Rio – Achaia, Faculty of Chemical Engineering – University of Patras

<sup>2</sup> Stadiou Str. – Platani – 26504, Foundation of Research and Technology – Institute of Chemical Engineering Sciences

<sup>3</sup> Institute for Organic Synthesis and Photoreactivity (ISOF), National Research Council of Italy (CNR), Via P. Gobetti 101, I-40129 Bologna, Italy

<sup>4</sup> Sabanci University Integrated Manufacturing Technologies Research and Application Center & Composite Technologies Center of Excellence, Teknopark Istanbul, Pendik, 34906, Istanbul, Turkiye.

<sup>5</sup> Faculty of Engineering and Natural Sciences, Materials Science and Nanoengineering, Sabanci University, Tuzla, 34956, Istanbul, Turkiye.

\* [galiotis@chemeng.upatras.gr](mailto:galiotis@chemeng.upatras.gr), [manuela.melucci@isof.cnr.it](mailto:manuela.melucci@isof.cnr.it), [burcu.saner@sabanciuniv.edu](mailto:burcu.saner@sabanciuniv.edu), [ggorgolis@upatras.gr](mailto:ggorgolis@upatras.gr)

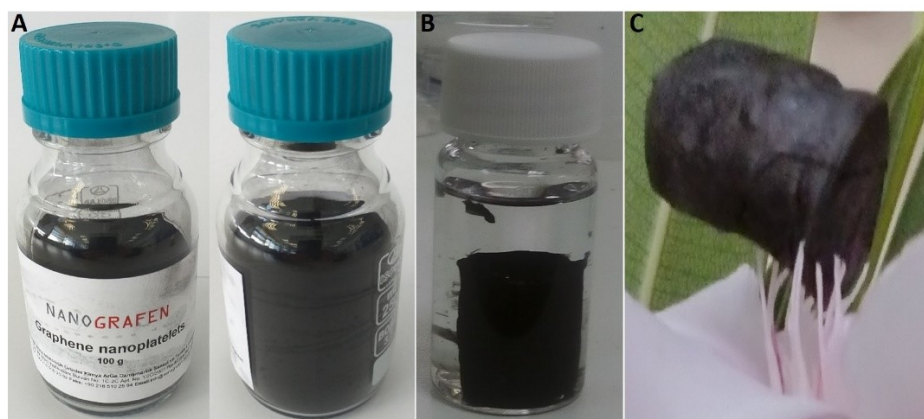

**Figure S1:** Graphene nanoplatelets derived from waste tires (GNP) and Graphene aerogels synthesis. (A) Digital image of the used GNPs powder from waste tires, (B) Graphene (rGO) hydrogel, and, (C) the as-obtained graphene aerogel after the freeze-drying.

**Table S1:** XPS data of the starting GNPs powder: % C1s and O1s component concentration derived from the C1s and O1s peak deconvolution respectively and relative atomic ratio C:O:Fe:Si

| % component of O bonds |      | % Relative atomic ratio |                     |        |     |                              |
|------------------------|------|-------------------------|---------------------|--------|-----|------------------------------|
| C=O                    | C-O  | C-C sp <sup>2</sup>     | C-C sp <sup>3</sup> | C-O(H) | C=O | C:O:Fe:Si                    |
| 43.0                   | 56.0 | 81.1                    | 12.0                | 5.1    | 1.8 | 93.5%, 5.5%,<br>0.20%, 0.80% |

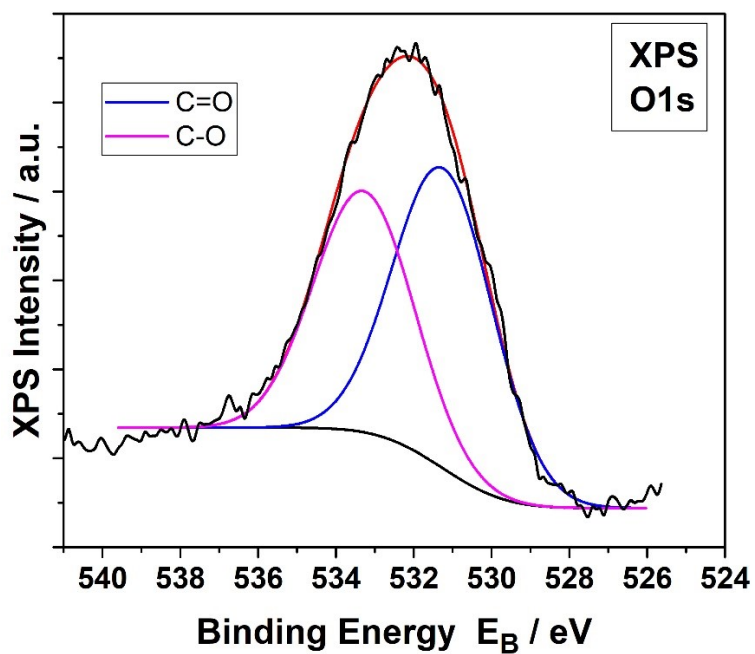

**Figure S2:** Deconvoluted O1s XPS spectrum of the GNPs powder.

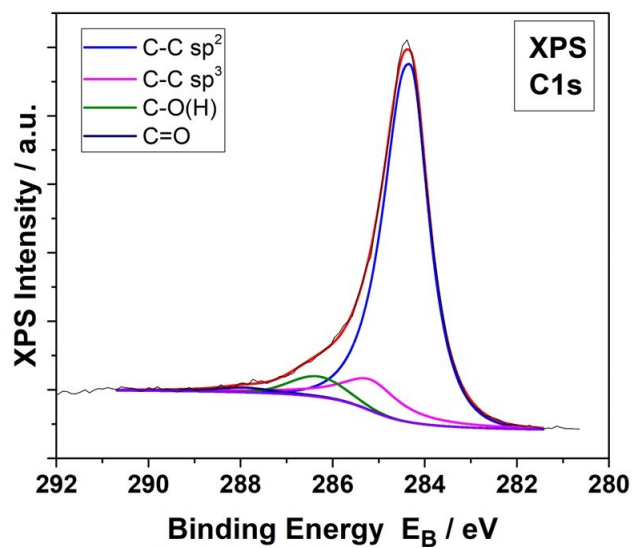

**Figure S3:** Deconvoluted C1s XPS spectrum of the GNPs powder.

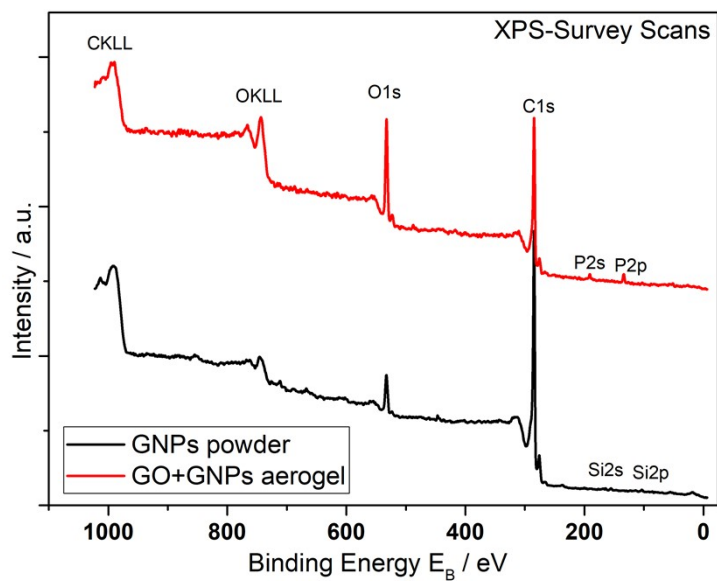

**Figure S4:** XPS Survey Scans from GNPs powder and GO+GNPs powder.

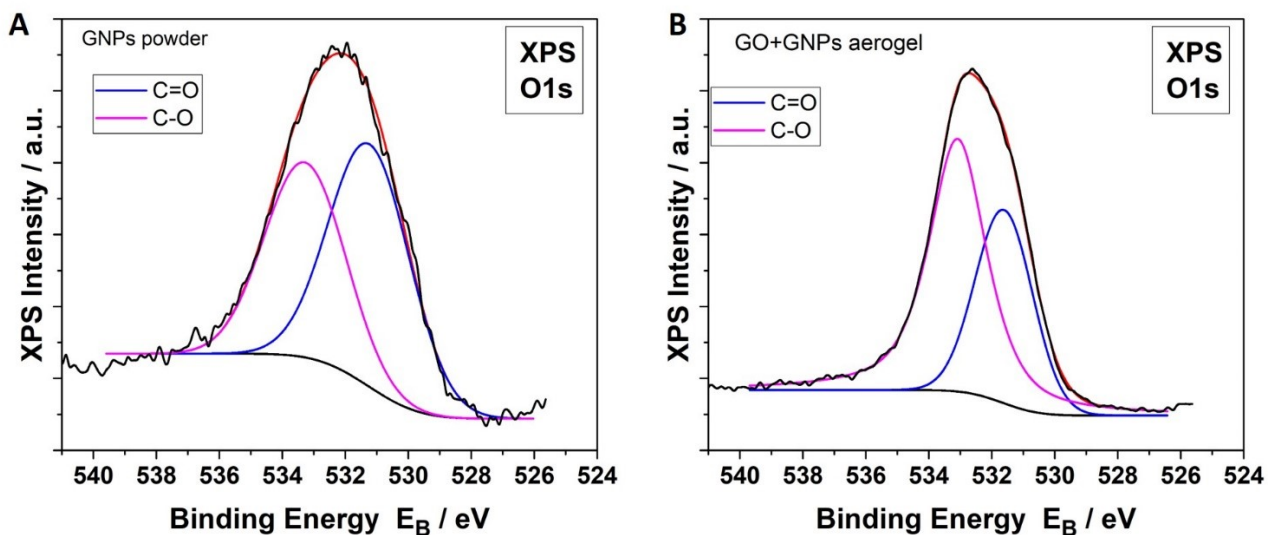

**Figure S5:** Deconvoluted O1s XPS spectra from (A) the GNPs powder, and, (B) the GO+GNPs aerogel.

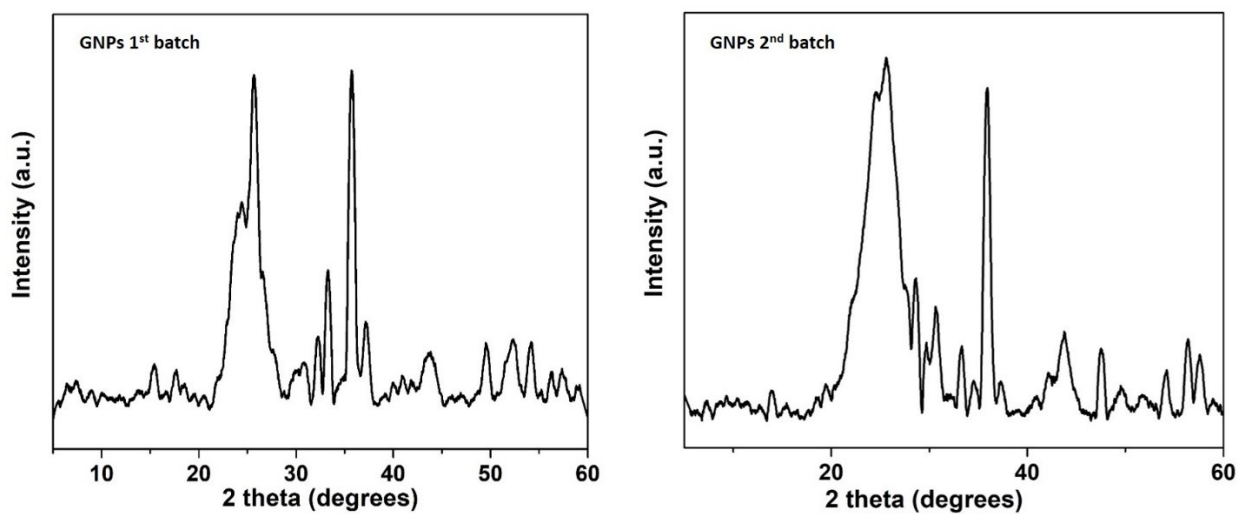

**Figure S6:** XRD patterns of the two examined products (1<sup>st</sup> batch and 2<sup>nd</sup> batch of GNPs derived from waste tires).

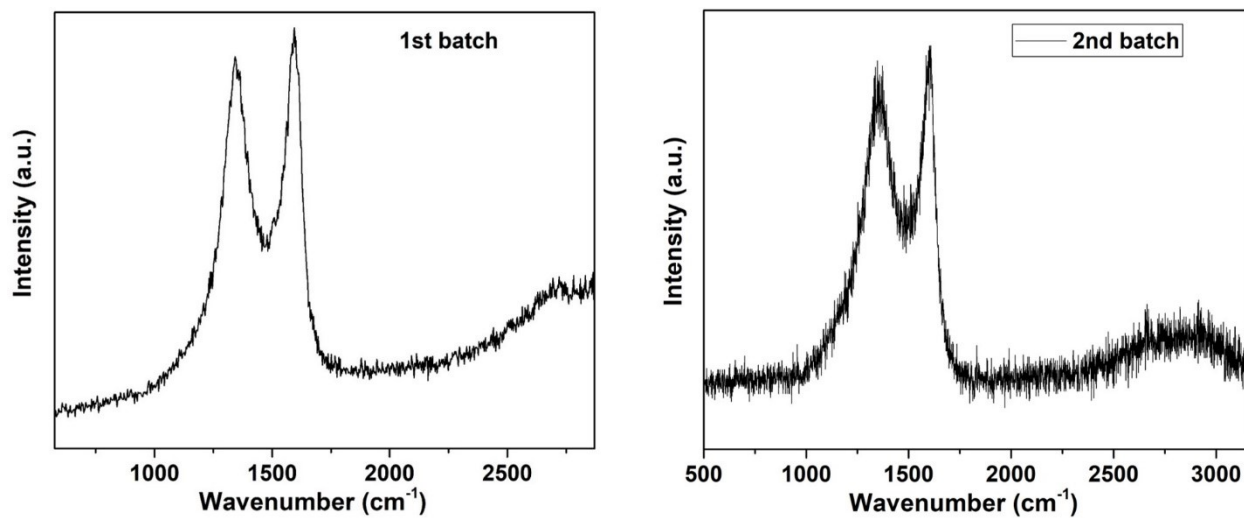

Figure S7: Raman spectra of the examined products (GNPs from the 1<sup>st</sup> and 2<sup>nd</sup> batches).

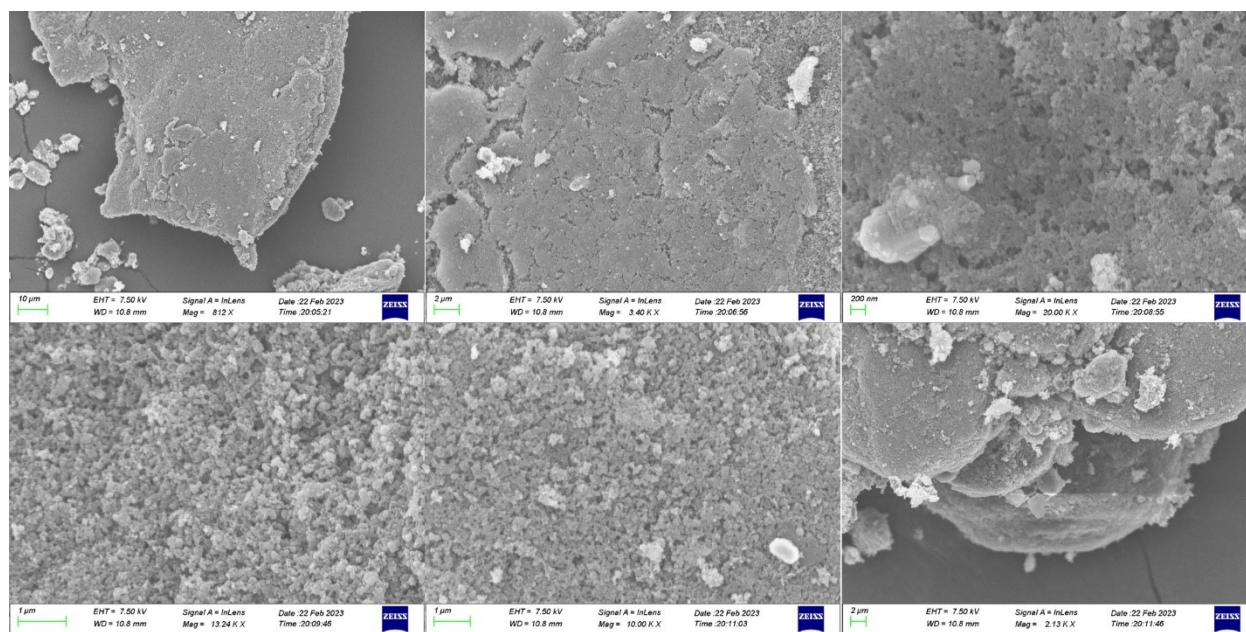

Figure S8: SEM images of the GNPs from 1<sup>st</sup> batch.

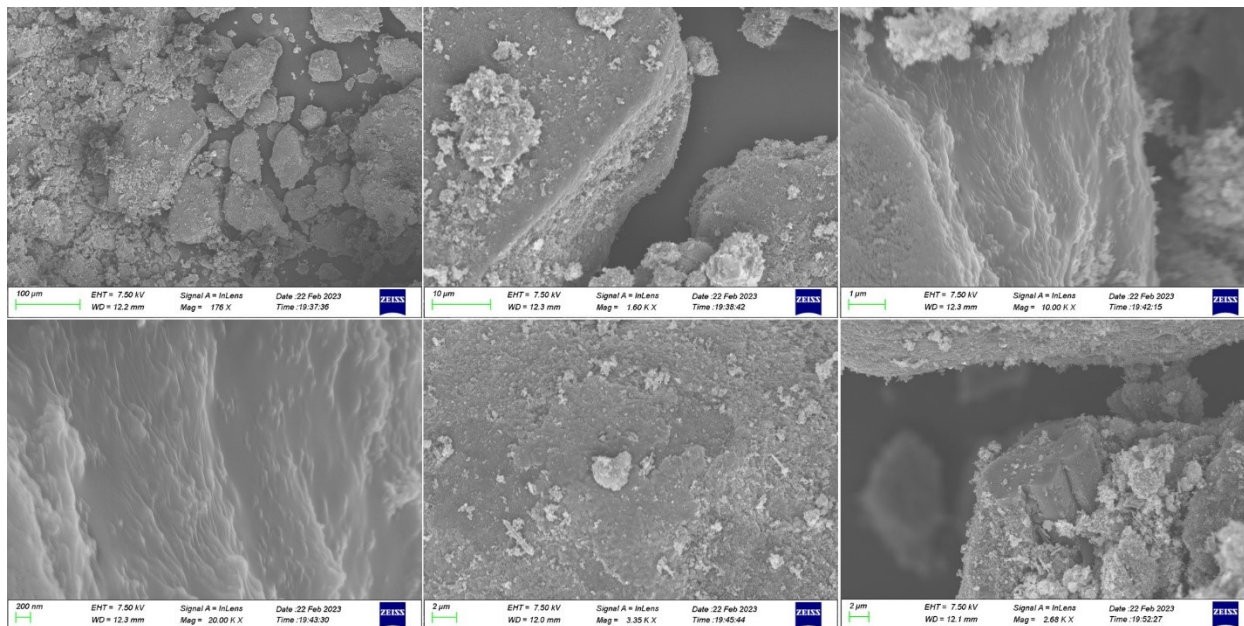

**Figure S9:** SEM images of the GNPs from 2<sup>nd</sup> batch.



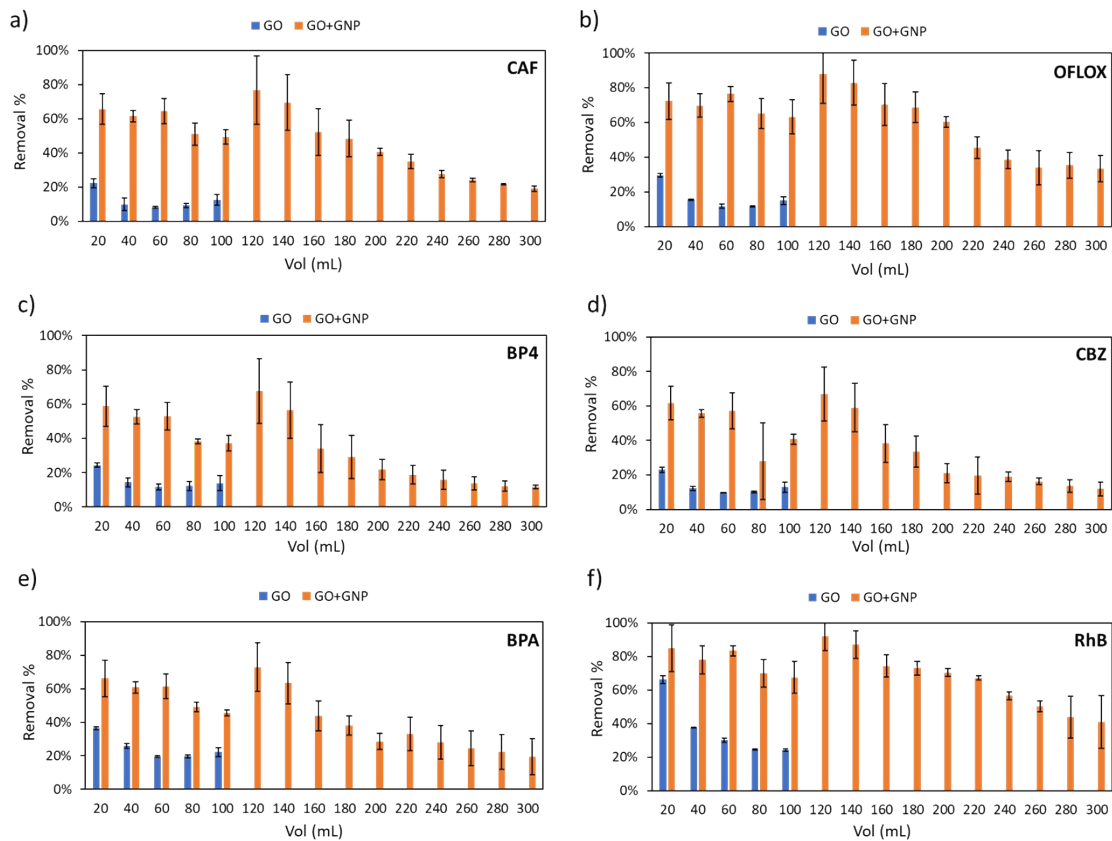

**Figure S10.** Removal of a) CAF, b) OFLOX, c) BP4, d) CBZ, e) BPA, f) RhB obtained by aerogels of GO (blue) and GO/GNP (orange) (0.5 mg/L each in tap water,  $V_{\text{tot}} = 300$  mL, flow rate = 2.5 mL/min).
